# Supplementary material for: Role of Chromatin Damage and Chromatin Trapping of FACT in Mediating the Anticancer Cytotoxicity of DNA-Binding Small-Molecule Drugs
Source: Oxford University Press journal article supplement (doi:10.1158/0008-5472.can-17-2690), 2018-01-16
Supplement: 00085472can172690-sup-188568_2_supp_4460584_p17rqq.docx [file 00085472can172690-sup-188568_2_supp_4460584_p17rqq.docx]

**Supplementary Data**

**Supplementary Materials and Methods**

**Supplementary Table 1:** Chemicals, cells, constructs and antibodies used in the study.

|  | | **Cat number / Reference** | **Manufacturer / Source** |
| --- | --- | --- | --- |
| **Chemicals** | |  |  |
|  | Doxorubicin | D1515 | Sigma-Aldrich |
|  | Etoposide | E1383 | Sigma-Aldrich |
|  | ICRF-193 | I4659 | Sigma-Aldrich |
|  | Gemcitabine | G6423 | Sigma-Aldrich |
|  | Merbarone | M2070 | Sigma-Aldrich |
|  | Aclacinomycin A | BML-AW8655-0005 | Enco |
|  | Mitoxantrone | CAS 65271-80-9 | Santa Cruz |
|  | SN-38 | 2684 | TOCRIS |
|  | Hoechst 33342 | H3570 | Thermo Fisher |
|  | CBL0100 |  | Incuron, LLC |
|  | CBL0137 |  |
|  | Verapamil | V4629 | Sigma-Aldrich |
|  | 9-Aminoacridine | 92817 | Sigma-Aldrich |
|  | Resazurin | R7017 | Sigma-Aldrich |
| **Cells** | |  |  |
|  | HeLa | CCL-2 | ATCC |
|  | HT1080 | CCL-121 | ATCC |
|  | HCT116 | CCL-247 | ATCC |
|  | MCF7 | HTB-22 | ATCC |
|  | HL60/VCR | (Rahman et al., 1992) |  |
| **Constructs** | |  |  |
|  | C-GFP-SSRP1 | (Gasparian et al., 2011) | Gurova Lab cloning |
|  | GFP-tagged SSRP1 deletion mutants | (Safina et al., 2017) | Gurova Lab cloning |
|  | SPT16-GFP | (Safina et al., 2017) | GeneCopoeia |
|  | mCherry-H1.5 | (Leonova et al., 2017, under review) | GeneCopoeia |
|  | pH2B_mCherry_IRES_puro2 | Addgene plasmid # 21045 | A gift from Daniel Gerlich |
|  | mOrange2-H4-23 | Addgene plasmid #57964 | A gift from Michael Davidson |
| **Antibodies** | |  |  |
|  | γH2AX (IF 1:200) | 9947 | Cell Signaling |
|  | anti-SSRP1 (WB 1: 4000) | 609702 | BioLegend |
|  | anti-Spt16 (WB 1: 4000) | 607002 | BioLegend |
|  | H3 (IF 1:200) | 4499 | Cell Signaling |
|  | H3 (WB 1: 10000) | 05-928 | EMD Millipore |
|  | Anti-β-Actin (1:20000) | A1978 | Sigma-Aldrich |
|  | anti-mouse (1:4000) | sc2005 | Santa Cruz |
|  | anti-rabbit (1:4000) | sc2004 | Santa Cruz |

**Cytotoxicity**

HeLa, MCF7, HCT116 and HT1080 cells (3x103 cells/well) were seeded in 96-well plates for overnight adhesion. HL60/VCR suspension cells (5x103 cells/well) were seeded in 96-well plates and treated the same day. 50M of 9-Aminoacridine was used as a positive control for complete cell death. Cells were treated for 48 h with a range of drug concentrations. Cell viability was determined with resazurin saline solution. Fluorescence was measured at 560Ex/590Em using Tecan Infinite 200 PRO reader.

**DNA damage**

H2AX (Cell Signaling, cat# 9947) and comet assay (Cell Biolabs, Inc., cat# STA-355) were used to detect the ability of the compounds to induce cellular DNA breaks. HT1080 cells were treated with compounds (1 or 3µM) for 1 or 3 h followed by staining for H2AX using standard immunofluorescent staining protocol (see below).HeLa cells treated with 3M compounds for 6 h were combined with Comet Agarose at a 1:10 ratio and applied to a preheated OxiSelect™ 96-Well Comet Slide at 37°C for 15 min followed by an hour immersion in pre-chilled lysis buffer at 4°C in the dark. Before alkaline electrophoresis, the slide was immersed in pre-chilled alkaline solution for 30 minutes at 4°C in the dark.Alkaline electrophoresis was performed at 1 volt/cm (300mA) for 15-30 min. The slide was then washed with pre-chilled ddH2O and cold 70% ethanol and dried. The staining was performed using Vista Green DNA dye. Quantitation was performed to determine the proportion of cells with tails as an average of two replicates ±SD.

**Extraction of soluble and chromatin-bound proteins from cells**

Cells were lysed on ice using 1x Cell Culture Lysis Reagent (Promega, cat# E1531) containing protease inhibitors (1:25, Roche, cat# 1838145). Extracts were centrifuged at 10,000 rpm for 10 min at 4oC to obtain the soluble fraction. The chromatin-bound proteins were obtained by resuspension of the remaining pellets in 1x Cell Culture Lysis Reagent followed by sonication three times for 30 sec each using the Bioruptor UCD-200, Diagenode. Protein concentrations were measured using Quick Start Bradford 1x Dye Reagent (Bio-Rad, cat# 500-0205). Equal amounts of protein were run on gradient 4-20% precast gels (Invitrogen) and transferred to Immobilon-P membrane (Millipore).

**Western Blot Analysis**

Membranes were blocked with 5% non-fat milk-TBS-T buffer for 1 hour and incubated overnight with primary antibodies. The following primary antibodies were used: anti-SSRP1 (1: 4000; BioLegend, cat# 609702), anti-Spt16 (1: 4000; BioLegend, cat# 607002), and H3 (1: 10000; EMD Millipore, cat# 05-928). Anti-β-Actin (1:20000; Sigma, cat# A1978) was used to verify equal protein loading and transfer. After hybridization to a horseradish peroxidase-conjugated anti-mouse (1:4000; Santa Cruz, cat# sc2005) or anti-rabbit (1:4000; Santa Cruz, cat# sc2004) secondary antibodies, washed blots were incubated with ECL solution (Western Lightning® Plus-ECL, Enhanced Chemiluminescence Substrate; Perkin Elmer, cat# NEL104001EA) visualized using autoradiography film (Denville Scientific).

**Immunofluorescent staining and fluorescent microscopy**

For immunofluorescent staining cells were fixed with 4% paraformaldehyde, 0.1% Triton X100 in PBS, followed by blocking with PBS containing 3% BSA, and staining with appropriate antibodies (Suppl. Table 1) in the 0.6% BSA, 0.05% Triton X100 in PBS solution. Washing was done with 0.1% Triton X100 in PBS. Fluorescent images of live and fixed cells as well as compound auto-fluorescence were obtained with a Zeiss Axio Observer A1 inverted microscope with N-Achroplan 100×/1.25 oil lens, Zeiss MRC5 camera, and AxioVision Rel.4.8 software.

**Micrococcal nuclease digestion**

Effect of the compounds on nucleosome stability within chromatin was analyzed using HeLa cell nuclei with the drugs, followed by assessment of chromatin sensitivity to digestion with micrococcal nuclease (MNase; New England BioLabs, cat# M0247S), preferentially digesting protein-free DNA. Drugs (100µM) were incubated for 15 minutes with nuclei of HeLa cells, followed by MNase digestion and DNA extraction (Ultra Pure Phenol:Chloroform:Isoamyl Alcohol; Invitrogen, cat# 15593-031). DNA was further precipitated with ethanol 100%, washed with ethanol 70%, dried and dissolved in 20µl of TE buffer. Agarose 1.5% gel electrophoresis was performed at 80v.

**Statistical Analyses**

IC50, IC90 and EC50 values were obtained using GraphPad Prism 5.02 software by nonlinear regression with an inhibitory dose-response model. The statistical significance of correlation between different effects of DNA-binding compounds was assessed using either Pearson (for measured parameters) or Spearman (for ranked parameters) correlation coefficients using GraphPad Prism 5.02 software.

1. Rahman A, Husain SR, Siddiqui J, Verma M, Agresti M, Center M*, et al.* Liposome-mediated modulation of multidrug resistance in human HL-60 leukemia cells. J Natl Cancer Inst **1992**;84:1909-15

2. Safina A, Cheney P, Pal M, Brodsky L, Ivanov A, Kirsanov K*, et al.* FACT is a sensor of DNA torsional stress in eukaryotic cells. Nucleic acids research **2017**;45:1925-45

3. Safina A, Garcia H, Commane M, Guryanova O, Degan S, Kolesnikova K*, et al.* Complex mutual regulation of facilitates chromatin transcription (FACT) subunits on both mRNA and protein levels in human cells. Cell cycle **2013**;12:2423-34

4. Gasparian AV, Burkhart CA, Purmal AA, Brodsky L, Pal M, Saranadasa M*, et al.* Curaxins: anticancer compounds that simultaneously suppress NF-kappaB and activate p53 by targeting FACT. Sci Transl Med **2011**;3:95ra74

5. Garcia H, Miecznikowski JC, Safina A, Commane M, Ruusulehto A, Kilpinen S*, et al.* Facilitates chromatin transcription complex is an "accelerator" of tumor transformation and potential marker and target of aggressive cancers. Cell Rep **2013**;4:159-73

6. Li H, Durbin R. Fast and accurate long-read alignment with Burrows-Wheeler transform. Bioinformatics **2010**;26:589-95

7. Zhang Y, Liu T, Meyer CA, Eeckhoute J, Johnson DS, Bernstein BE*, et al.* Model-based analysis of ChIP-Seq (MACS). Genome Biol **2008**;9:R137

8. Ross-Innes CS, Stark R, Teschendorff AE, Holmes KA, Ali HR, Dunning MJ*, et al.* Differential oestrogen receptor binding is associated with clinical outcome in breast cancer. Nature **2012**;481:389-93
